# Supplementary material for: Kras mutation rate precisely orchestrates ductal derived pancreatic intraepithelial neoplasia and pancreatic cancer
Source: PubMed Central journal article supplement (PMC8172380; doi:10.1038/s41374-020-00490-5), 2020-10-02
Supplement: 41374_2020_490_MOESM1_ESM.pdf [file 41374_2020_490_MOESM1_ESM.pdf]

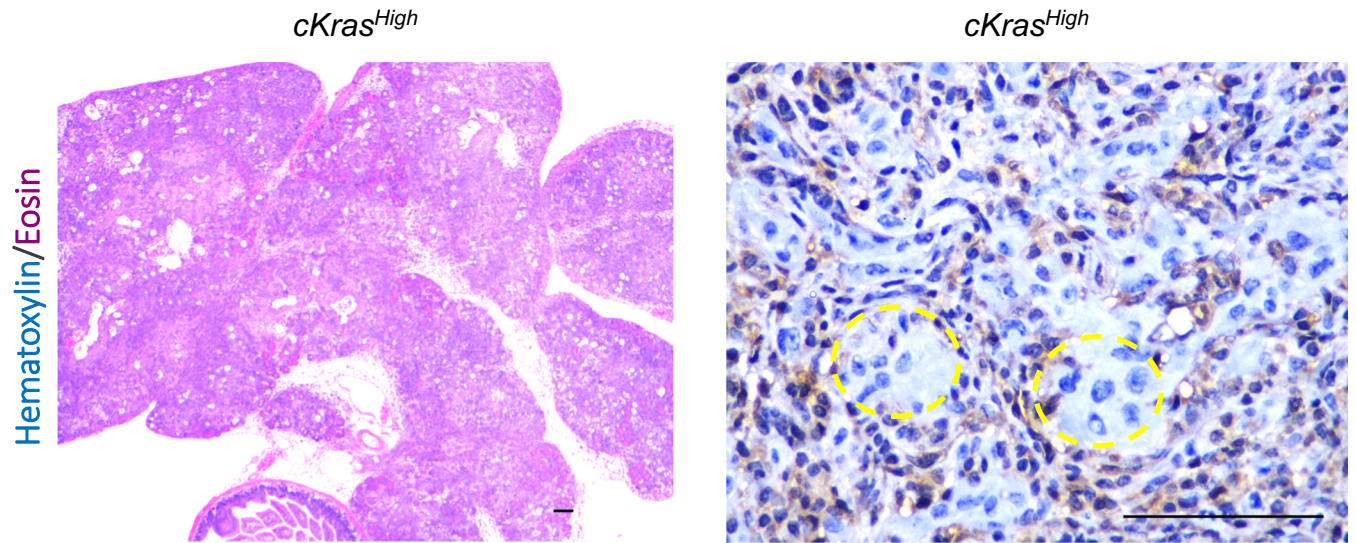

**Supplemental Figure 1. Expression of *cKras* in greater than 90% of pancreatic ducts generates poorly differentiated PDAC.** H&E analysis confirms abundant PDAC and IHC staining for GFP reveals loss of GFP/recombination of *cKras<sup>High</sup>* in PDAC tumors. Scale bars are 50uM.

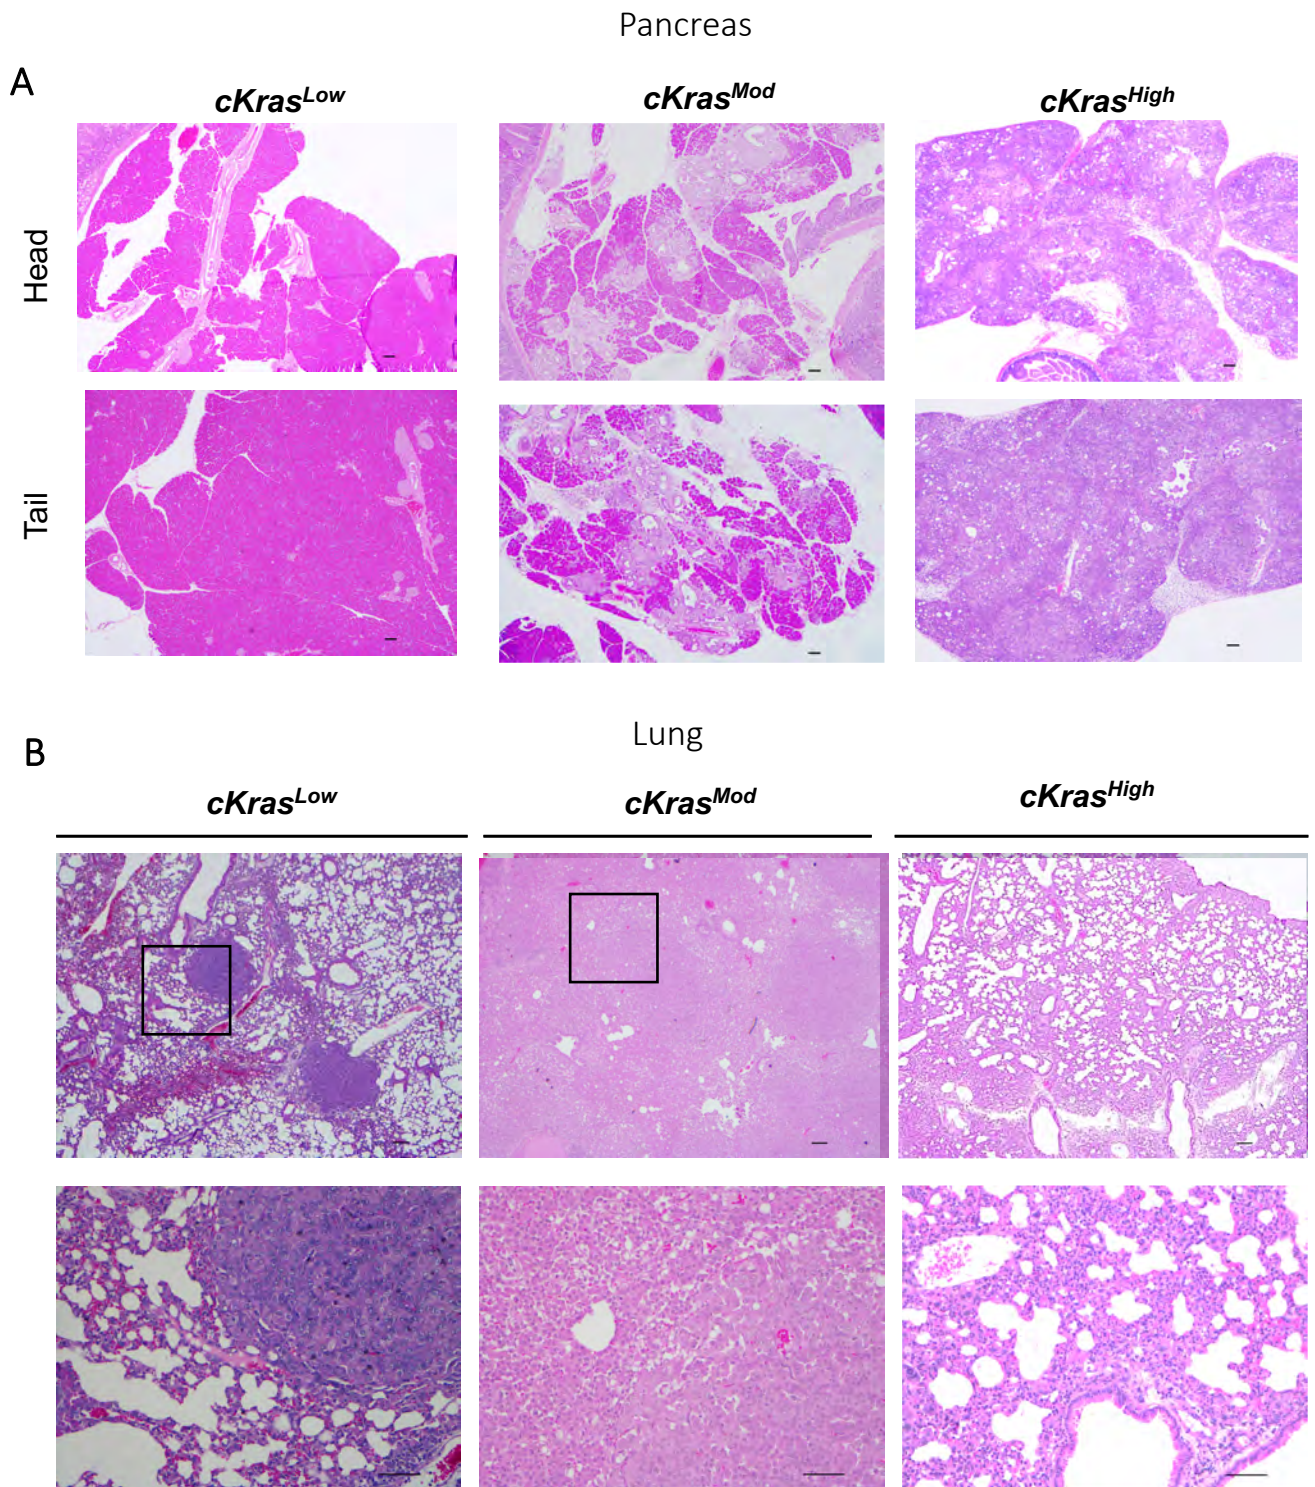

**Supplemental Figure 2. Expression of *cKras* in pancreatic ducts promotes PanIN and PDAC in head and tail.** **A.** H&E analysis confirms PanIN and PDAC in head and tail regions of the pancreas in *cKras<sup>Mod</sup>* and *cKras<sup>High</sup>* mice. **B.** Lung pathology of *cKras<sup>Hnf1b/+</sup>* mice. *cKras<sup>Low</sup>* (adenoma), *cKras<sup>Mod</sup>* (adenocarcinoma) and *cKras<sup>High</sup>* (inflammation) mice. Scale bars are 50µM.

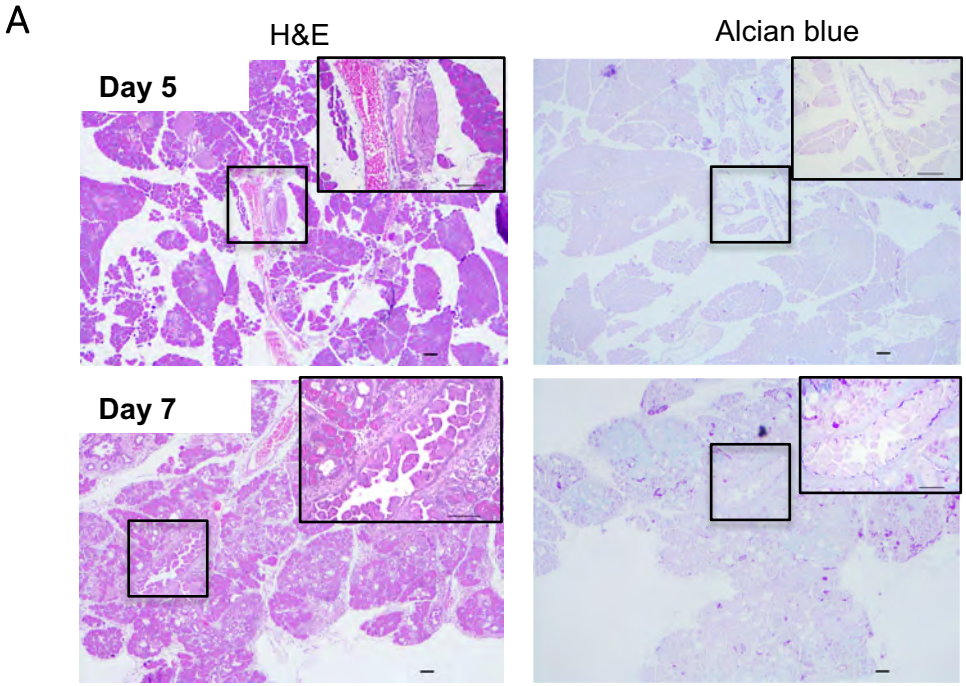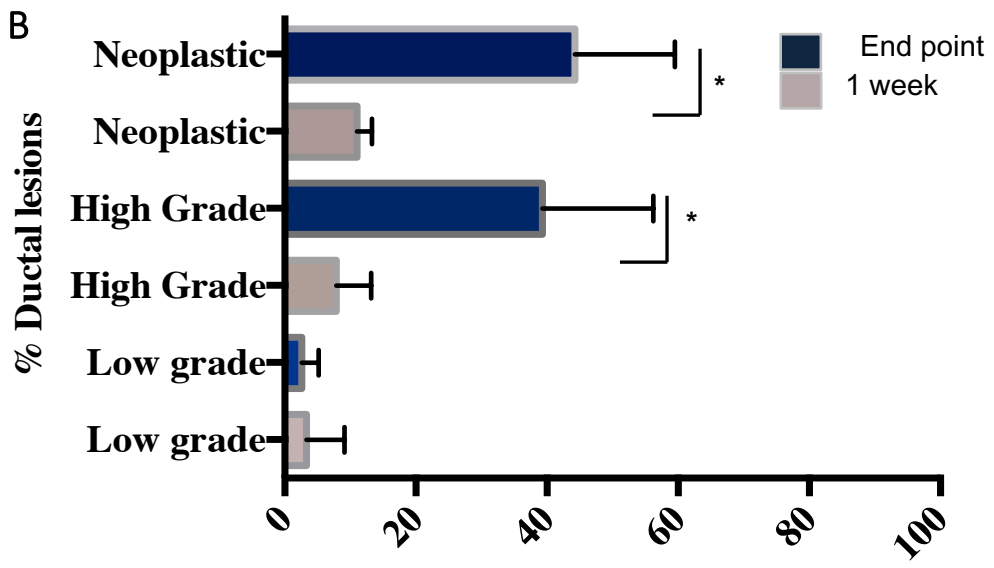

**Supplemental Figure 3, Related to Figure 3. *cKras<sup>High</sup>* mice generate PDAC in the absence of early PanIN. (A) *cKras<sup>High</sup>* mice progress to PDAC through advanced PanIN lesions (inset higher magnification). Early time points day 5 and day 7. H&E showing advanced PanIN and adjacent panels are Alcian Blue staining showing lack of mucin in these lesions. Scale bar is 50um.**

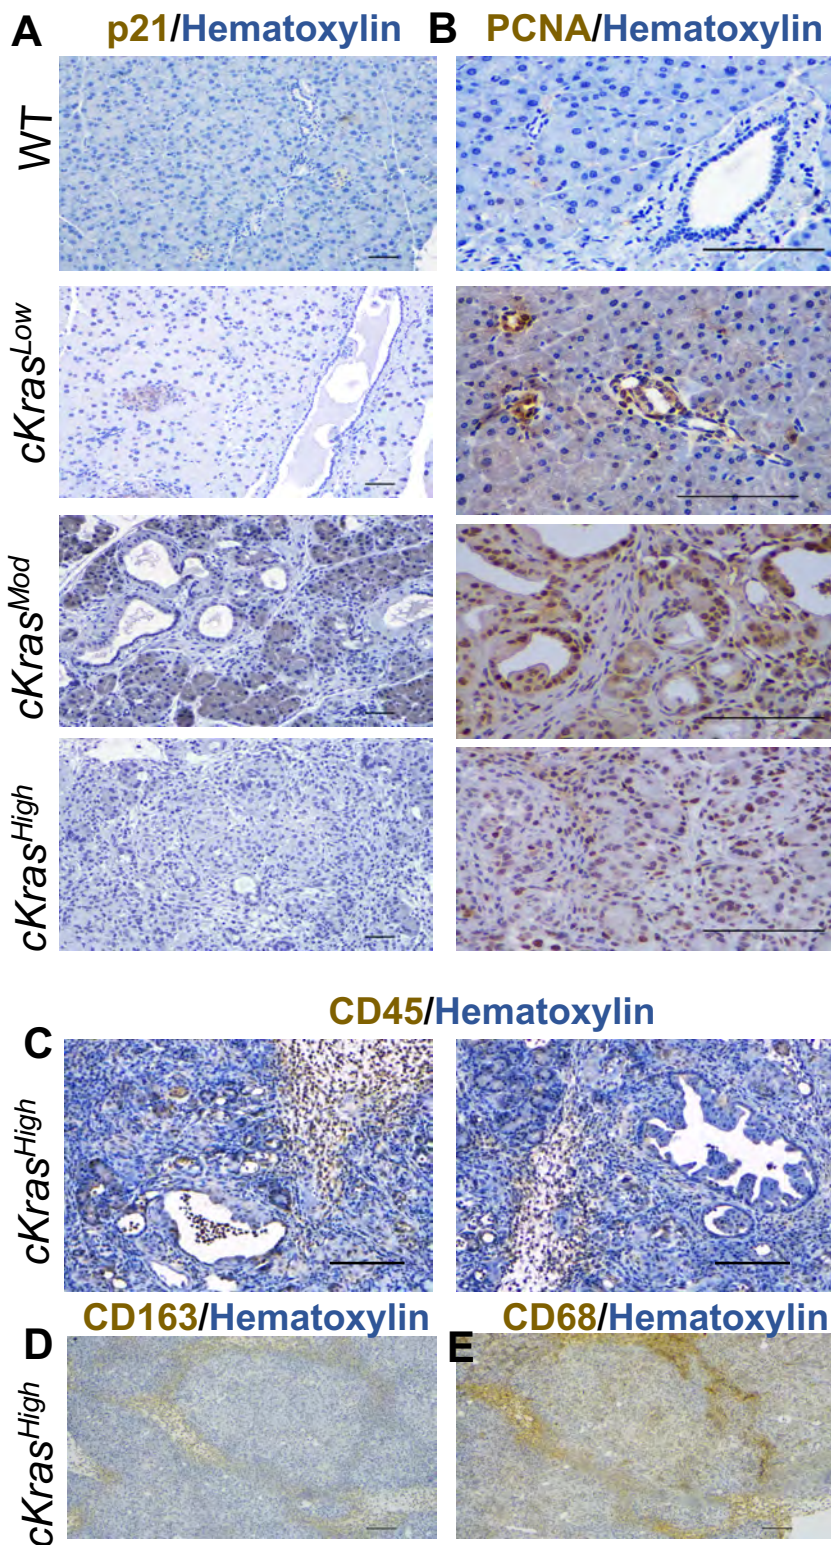

**Supplemental Figure 4: Ductal derived PanIN and PDAC do not express the senescent marker p21.** (A) IHC data showing lack of p21 labeling in ductal regions of *cKras<sup>Low</sup>*, *cKras<sup>Mod</sup>* and *cKras<sup>High</sup>* mice. (B) PCNA labeling confirms proliferative ductal cells in *cKras<sup>Low</sup>*, *cKras<sup>Mod</sup>* and *cKras<sup>High</sup>* mice. (C) CD45 immunolabeling in *cKras<sup>High</sup>* reveals abundant lymphocyte or immune infiltration in ductal derived PDAC. (D, E) CD163 and CD68 immunolabeling further subtype immune infiltration to show M2 macrophage are present in *cKras<sup>High</sup>* ductal derived PDAC. Scale bars are 50μM. Three slides per mouse were stained with the described antibodies. Representative images are shown. Scale bars are 50um.

## Masson's Trichrome Staining

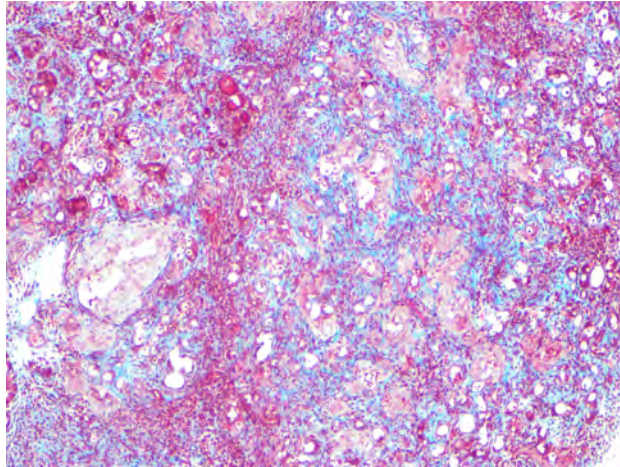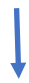

Color deconvolution

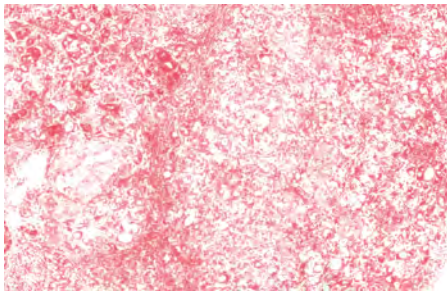

Red

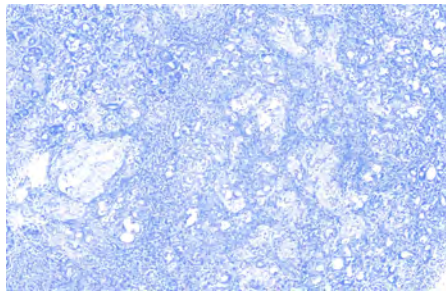

Blue

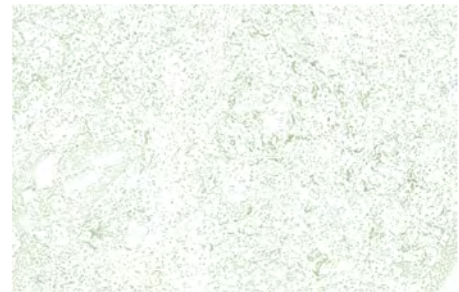

Green

**Supplemental Figure 5: Representative images of deconvolution using imageJ software to quantify collagen composition in trichrome stained images.** For Collagen fiber quantification, Masson's trichrome stained pancreatic sections were used. The color deconvolution plugin of ImageJ software was used to quantify the collagen area in five randomly chosen fields of each pancreatic section. Fibrosis was calculated as percentage of total pancreatic area. Three mice per group were quantified.

Supplementary Table 1. List of Antibodies used in the study

| Antibodies                                      | Dilution<br>IHC | Dilution<br>Western<br>blotting | Species | Catalogue<br>no | Source                    |
|-------------------------------------------------|-----------------|---------------------------------|---------|-----------------|---------------------------|
| Ras                                             | X               | 1:200                           | Mouse   | 16117           | Thermofisher Scientific   |
| KRT19                                           | 1:100           | 1:1000                          | Rat     | TROMA III       | DSHB                      |
| Phospho-p44/42 MAPK (Erk1/2)<br>(Thr202/Tyr204) | 1:100           | 1:1000                          | Rabbit  | 4370            | Cell Signaling Technology |
| p44/42 MAPK (Erk1/2)                            | 1:100           | 1:1000                          | Rabbit  | 4695            | Cell Signaling Technology |
| Phospho-Akt (Thr308)                            | 1:100           | 1:1000                          | Rabbit  | 38449           | Cell Signaling Technology |
| Phospho-Akt (S473)                              | 1:100           | 1:1000                          | Rabbit  | 4060            | Cell Signaling Technology |
| Akt (pan)                                       | 1:100           | 1:1000                          | Rabbit  | 4685            | Cell Signaling Technology |
| Phospho-EGF Receptor (Tyr1068)                  | 1:100           | 1:1000                          | Rabbit  | 3777            | Cell Signaling Technology |
| PTEN                                            | 1:100           | 1:1000                          | Rabbit  | 9188            | Cell Signaling Technology |
| GFP                                             | 1:200           | 1:1000                          | Mouse   | Sc-9966         | Santa Cruz                |
| PCNA                                            | 1:2000          | X                               | Mouse   | Pc-10 Ab-29     | Abcam                     |
| P53                                             | 1:100           | X                               | Mouse   | Sc-126          | Santa Cruz                |

DSHB- Developmental Studies Hybridoma Bank
